# Supplementary material for: Wings as impellers: Honey bees co-opt flight system to induce nest ventilation and disperse pheromones
Source: Oxford University Press journal article supplement (doi:10.1242/jeb.149476), 2017-01-01
Supplement: jeb149476supp.pdf [file jeb149476supp.pdf]

## Movies

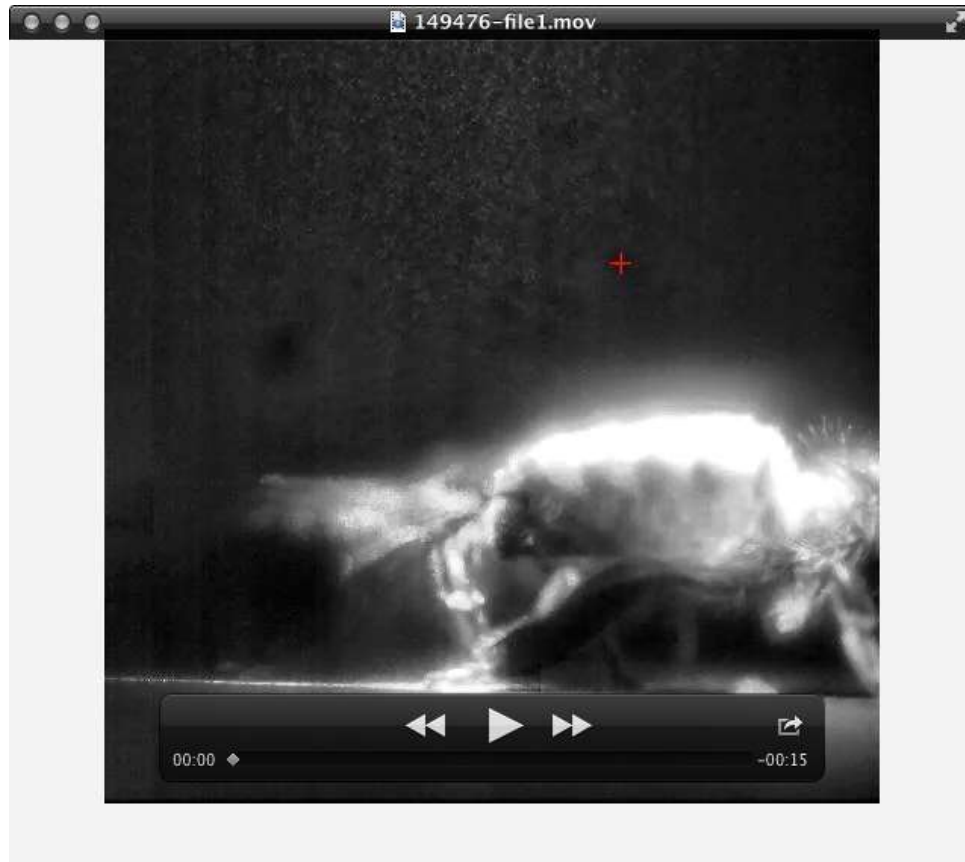

Movie 1. Flow visualization of a scenting honey bee. A vortex is shed at the end of the dorsal stroke reversal, which is marked with a red cross. Slowed down approximately 400 times.

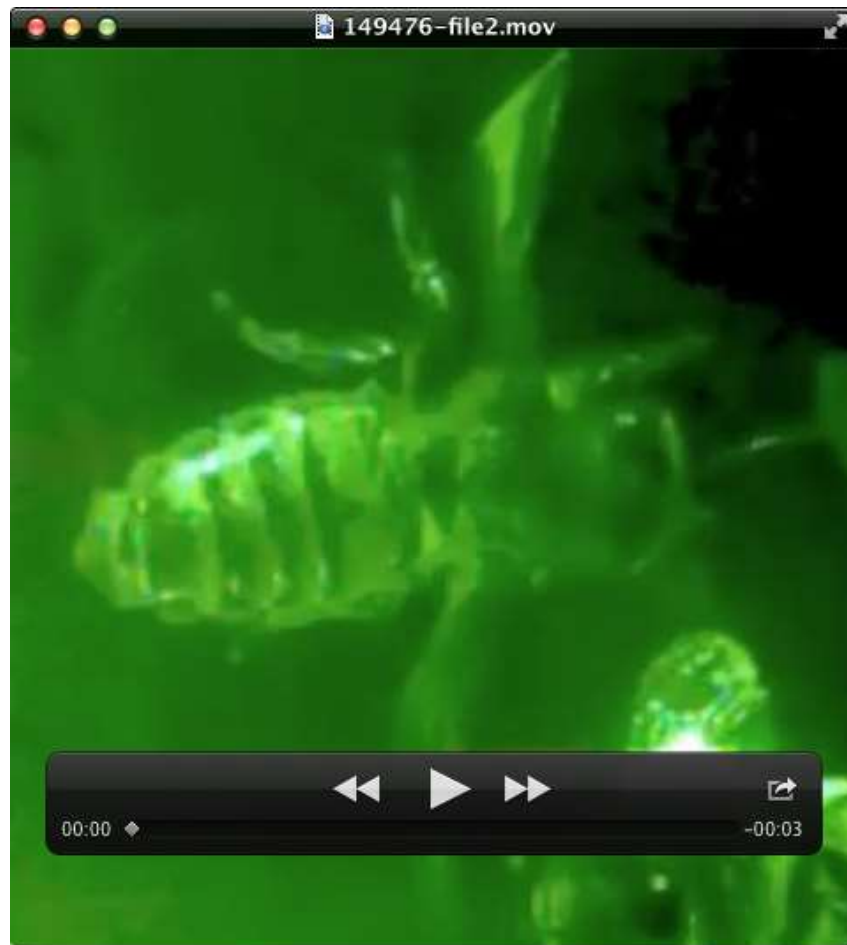

Movie 2. The dorsal stroke reversal of a honey bee as visualized from above. The wings are illuminated by a laser sheet to highlight the wing-wing contact. Slowed down approximately 600 times.

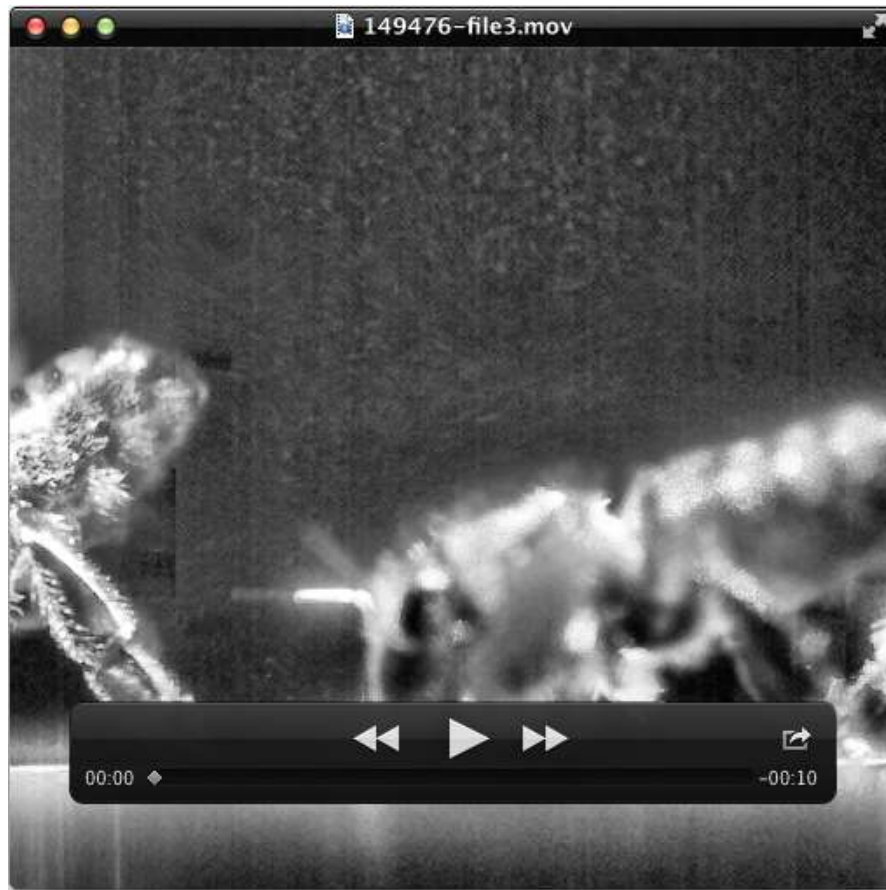

Movie 3. Side view of two scenting bees flapping in tandem. This configuration is also common during ventilator scenting bees. While the flow generated by individual bees may persist for only a few body lengths, bees fanning downstream can prevent the air from decelerating, leading to long distance transport. Slowed down approximately 250 times.
